# Supplementary material
Source: Springer Nature journal article supplement (https://www.springermedizin.de/resource/supplementary/12913_2012_2054_MOESM6_ESM.pdf/9529852)

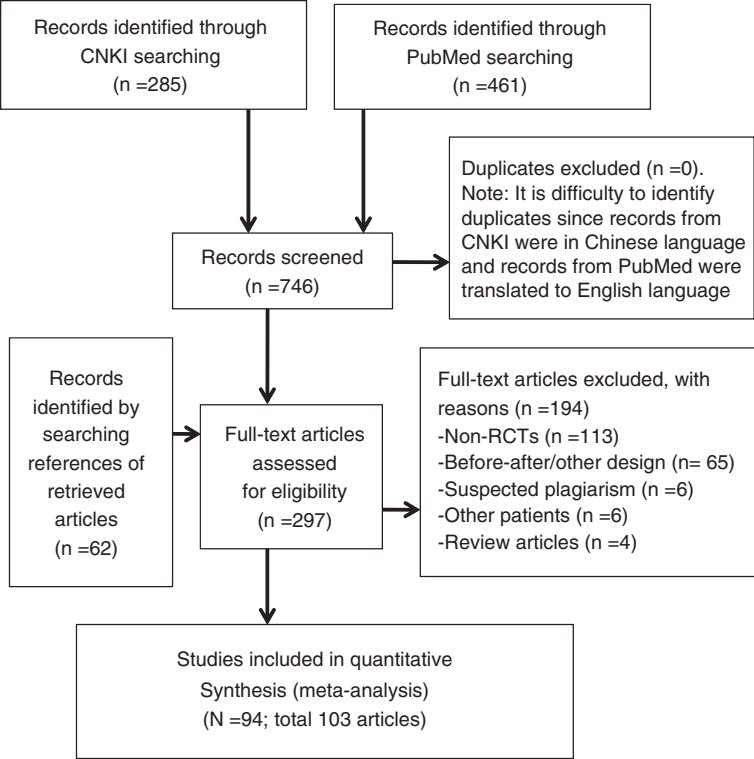

Supplement: MOESM6 [file 9529852]
